# Supplementary material
Source: publisher figshare collection journal article supplement (https://karger.figshare.com/articles/dataset/_/8870056)
Supplement: Supplementary file 2 [file 2]

# Faktoren, die das Wohlbefinden des Kindes in den ersten Lebensjahren fördern

Für die gesunde körperliche und kognitive Entwicklung spielt die Ernährung eine entscheidende Rolle

Die Darm-Hirn-Achse funktioniert in beide Richtungen. Ein besseres Verständnis bietet Möglichkeiten, den Fokus in der Gesundheitsversorgung von der Diagnose und Behandlung von Krankheiten verstärkt auf die Förderung des Wohlbefindens zu richten.

## FAKTOREN, DIE DIE KÖRPERLICHE UND KOGNITIVE ENTWICKLUNG FÖRDERN

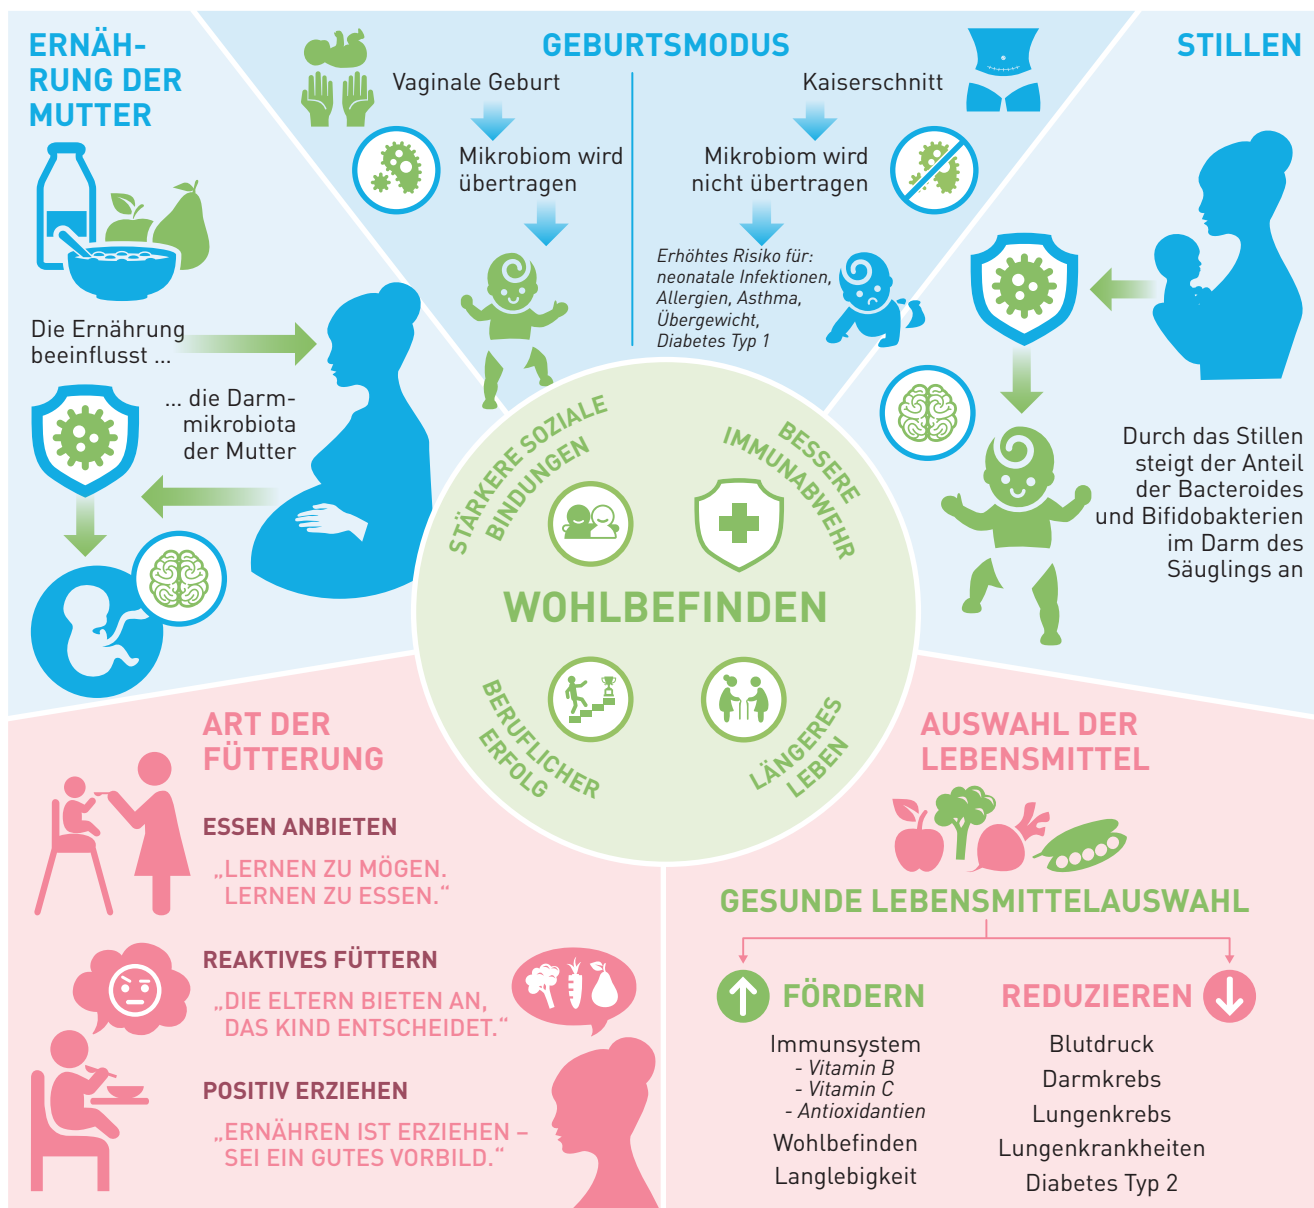

## FAKTOREN, DIE DIE ENTWICKLUNG VON GESUNDEN VERHALTENSWEISEN FÖRDERN

Der Einfluss der Mutter, das Ernährungsverhalten und die Wahl gesunder Lebensmittel tragen zu einer optimalen körperlichen und kognitiven Entwicklung bei und fördern das Wohlbefinden des Kindes.

Faktoren, die das Wohlbefinden des Kindes in den ersten Lebensjahren fördern

Annals of  
**Nutrition & Metabolism**

Annals of Nutrition & Metabolism  
Vol. 74, Suppl. 2, 2019

**NNI** Nestlé  
Nutrition  
Institute

Annales Nestlé  
Vol. 77, No. 1, 2019

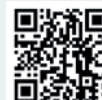

Nur für medizinisches Fachpersonal
