# Supplementary material
Source: publisher figshare collection journal article supplement (https://karger.figshare.com/articles/dataset/_/8870056)
Supplement: Supplementary file 3 [file 2]

# Первые годы жизни: вклад в здоровье детей

**Питание имеет решающее значение для физического и когнитивного развития**

Кишечный микробиом и мозг находятся в тесной взаимосвязи, образуя двунаправленную ось «кишка–мозг», способную оказывать влияние на развитие ребенка.

## ФАКТОРЫ, ПОДДЕРЖИВАЮЩИЕ ФИЗИЧЕСКОЕ И КОГНИТИВНОЕ РАЗВИТИЕ

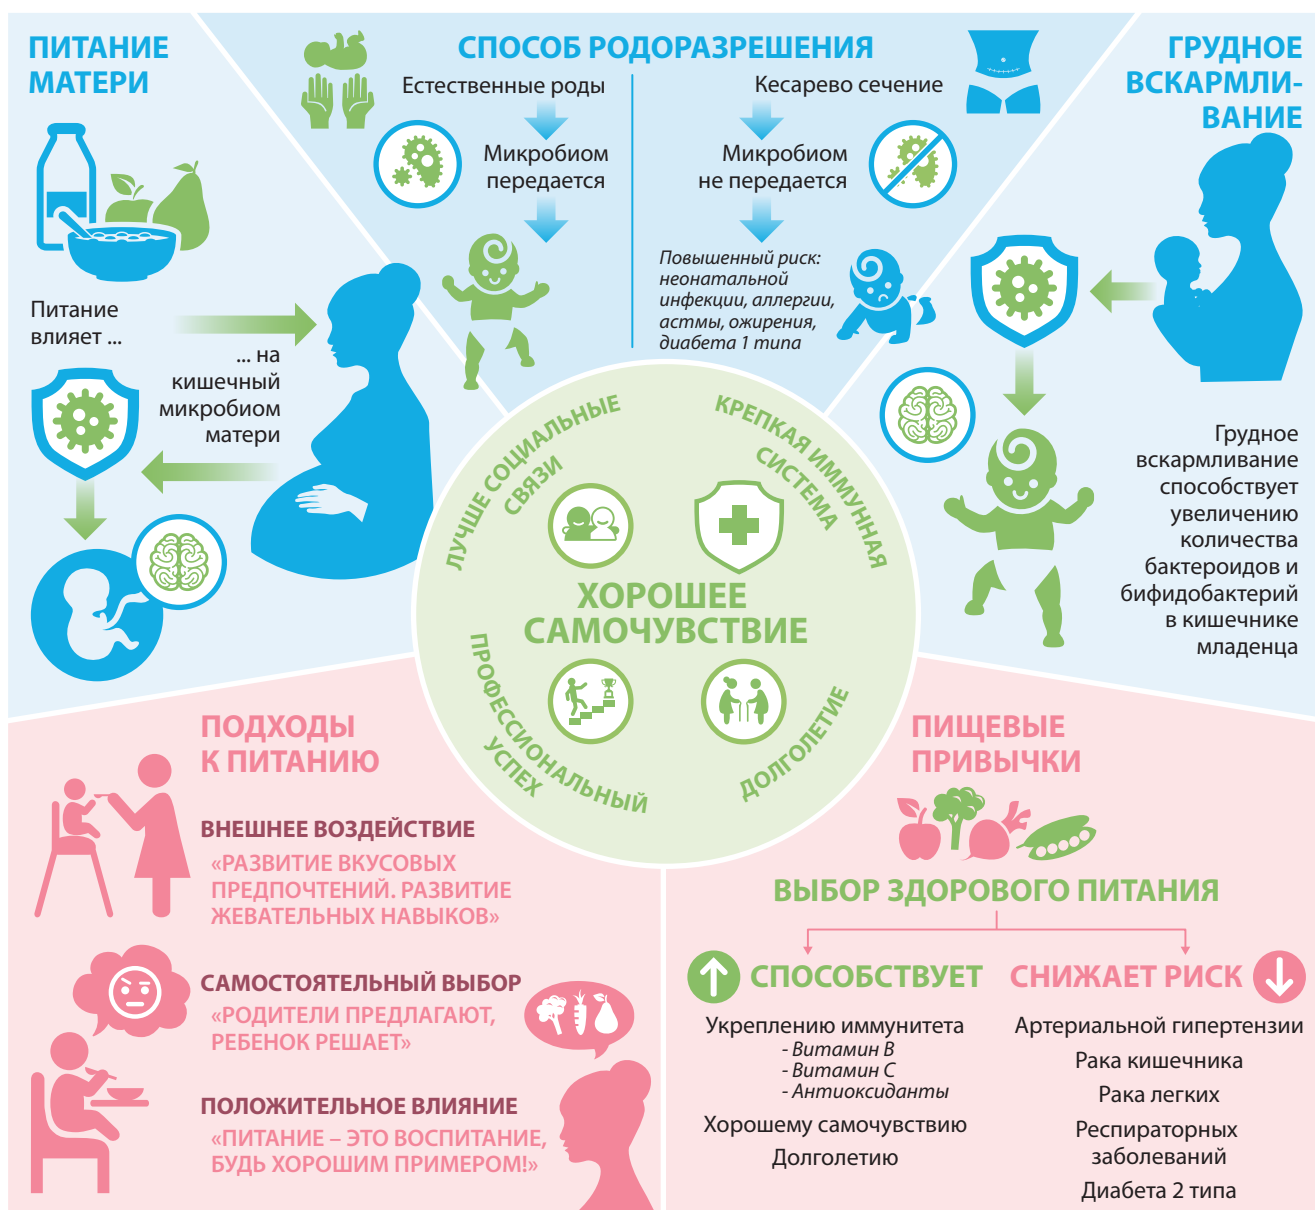

## ФАКТОРЫ, СПОСОБСТВУЮЩИЕ РАЗВИТИЮ ЗДОРОВЫХ ПРИВЫЧЕК

Правильное питание на ранних этапах жизни способствует оптимальному физическому и когнитивному развитию ребенка.

Первые годы жизни: вклад в здоровье детей

Annals of  
**Nutrition &  
Metabolism**

Annals of Nutrition & Metabolism  
Vol. 74, Suppl. 2, 2019

**NNI** Nestlé  
Nutrition  
Institute

Annales Nestlé  
Vol. 77, No. 1, 2019

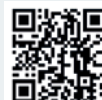

Информация только для медицинских работников
