# Supplementary material
Source: publisher figshare collection journal article supplement (https://karger.figshare.com/articles/dataset/_/8870056)

# Facteurs contribuant au développement harmonieux au cours des premières années de vie

L'alimentation joue un rôle clé dans le développement physique et cognitif en bonne santé

L'axe intestin-cerveau est bidirectionnel. Une meilleure compréhension de cette relation peut permettre de passer d'une politique de santé fondée sur le diagnostic et le traitement des maladies à une promotion d'un développement harmonieux

## FACTEURS CONTRIBUANT AU DÉVELOPPEMENT PHYSIQUE ET COGNITIF

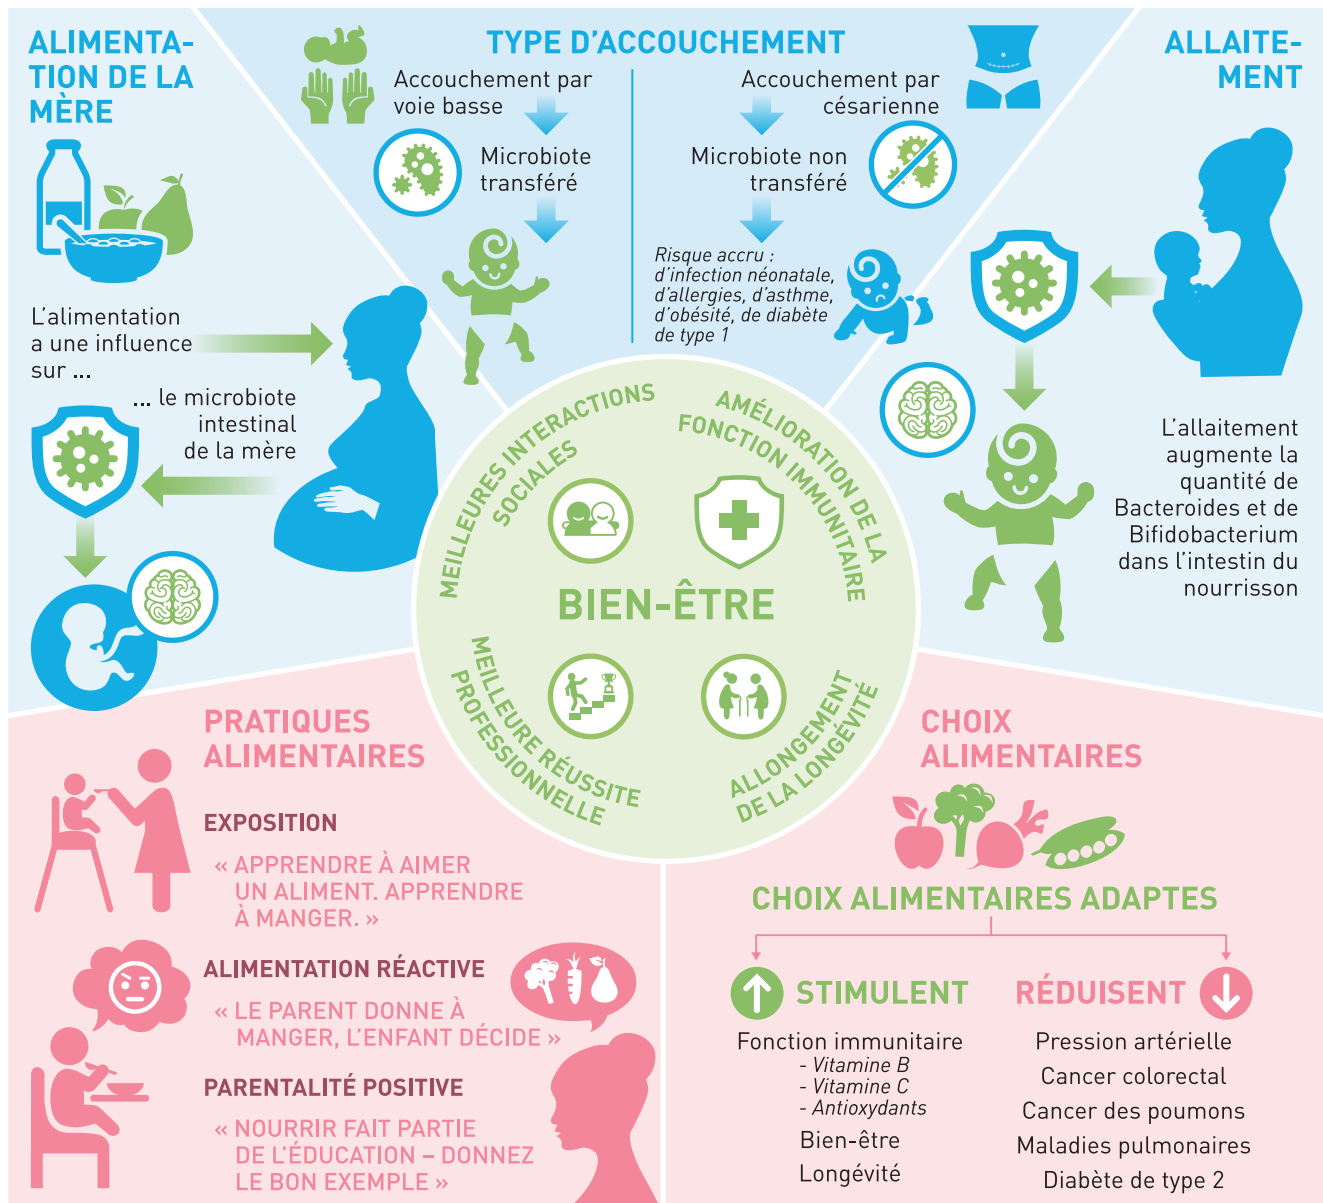

## FACTEURS SOUTENANT LE DÉVELOPPEMENT DE COMPORTEMENTS ADEQUATS

Les facteurs maternels, les pratiques alimentaires et les choix alimentaires adaptés contribuent à un développement physique et cognitif optimal et viennent soutenir le bien-être de l'enfant.

Facteurs contribuant au bien-être infantile au cours des premières années de vie

Annals of  
**Nutrition & Metabolism**

Annals of Nutrition & Metabolism  
Vol. 74, Suppl. 2, 2019

**NNI** Nestlé  
Nutrition  
Institute

Annales Nestlé  
Vol. 77, No. 1, 2019

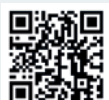

Supplement: Supplementary file 4 [file 2]
