# Supplementary material
Source: publisher figshare collection journal article supplement (https://karger.figshare.com/articles/dataset/_/8870056)
Supplement: Supplementary file 5 [file 2]

# Early-life contributors to child well-being

**Diet plays a key role in supporting healthy physical and cognitive development**

The gut-brain axis is bi-directional. A deeper understanding of this two-way relationship creates opportunities to change the focus of healthcare from the diagnosis and treatment of illness to the fostering of well-being.

## FACTORS SUPPORTING PHYSICAL AND COGNITIVE DEVELOPMENT

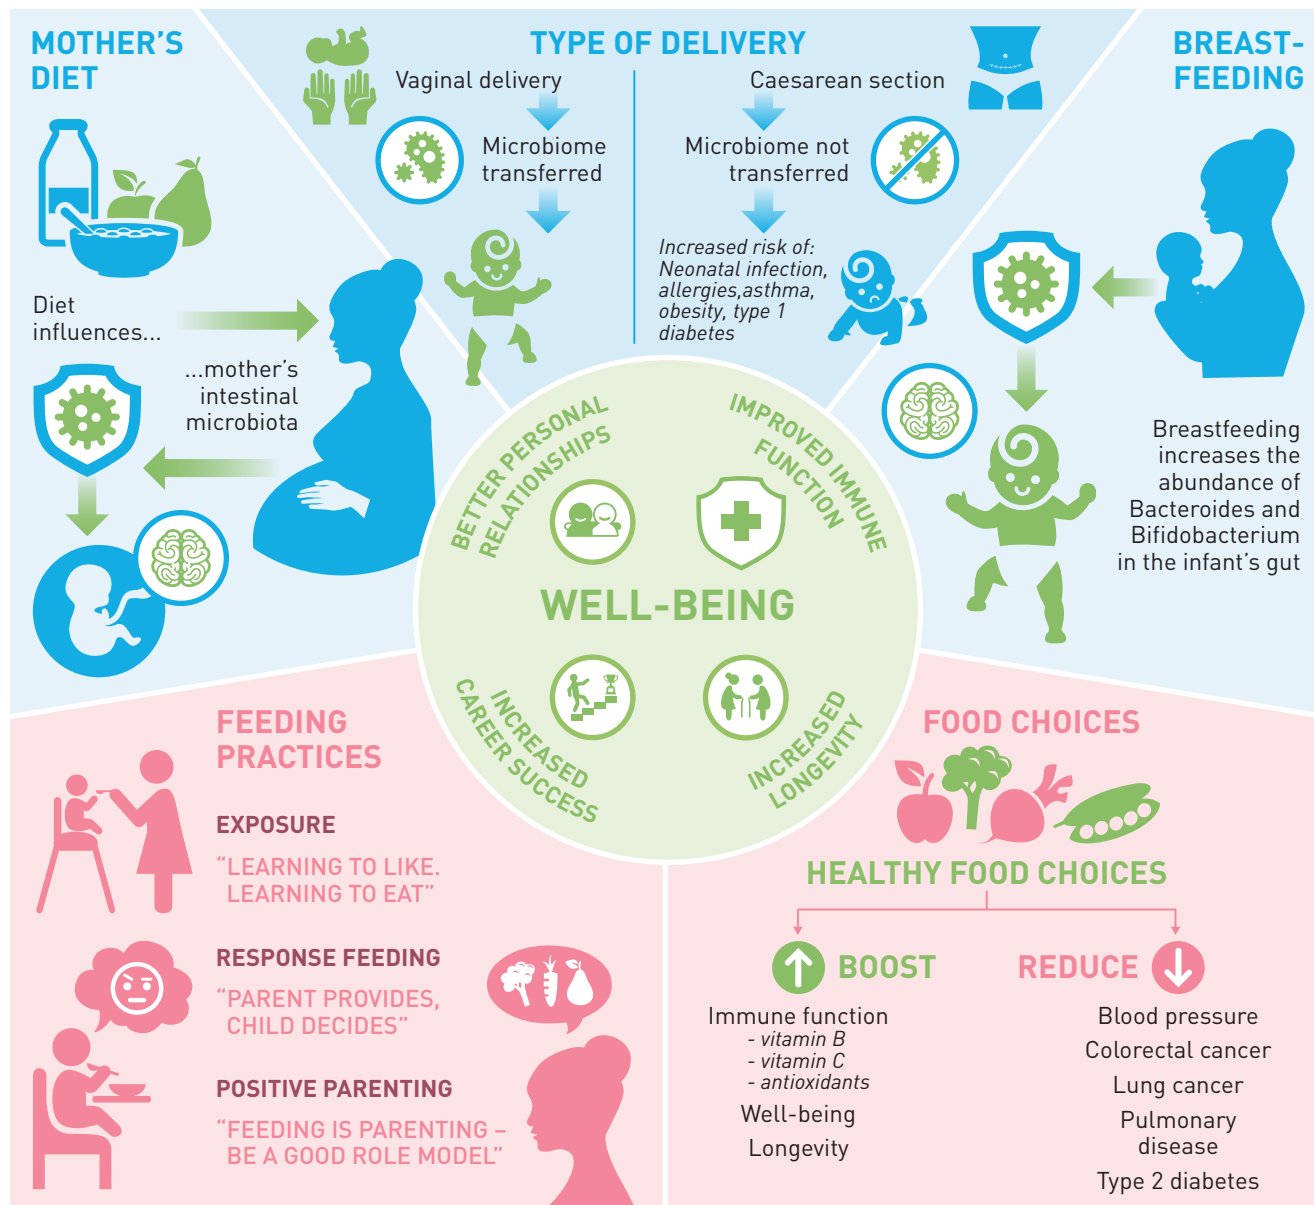

## FACTORS SUPPORTING THE DEVELOPMENT OF HEALTHY BEHAVIOURS

Maternal factors, feeding practices and healthy food choices contribute to optimal physical and cognitive development and support child well-being.

Early-life contributors to child well-being

Annals of  
**Nutrition & Metabolism**

Annals of Nutrition & Metabolism  
Vol. 74, Suppl. 2, 2019

**NNI** Nestlé  
Nutrition  
Institute

Annales Nestlé  
Vol. 77, No. 1, 2019

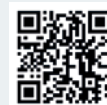

Information for Healthcare Professionals only

NNIA/CFinfo/September 2018

Breastfeeding is best for babies

**IMPORTANT NOTICE:** A well-balanced diet, both during pregnancy and after delivery, helps sustain an adequate supply of breastmilk. Exclusive breastfeeding is recommended during the first 6 months of life followed by the introduction of adequate nutritious complementary foods, along with sustained breastfeeding up to two years of age and beyond.
