# Supplementary material
Source: publisher figshare collection journal article supplement (https://karger.figshare.com/articles/dataset/_/8870056)
Supplement: Supplementary file 6 [file 2]

# Promotores de bem-estar nos primeiros anos de vida

A alimentação exerce um papel crucial no apoio ao desenvolvimento físico e cognitivo saudável

O eixo intestino-cérebro é bidirecional. Uma compreensão mais profunda dessa relação de mão-dupla cria oportunidades de mudança no foco da saúde, saindo do diagnóstico e tratamento de doenças para o incentivo ao bem-estar.

## FATORES QUE PROMOVEM O DESENVOLVIMENTO FÍSICO E COGNITIVO

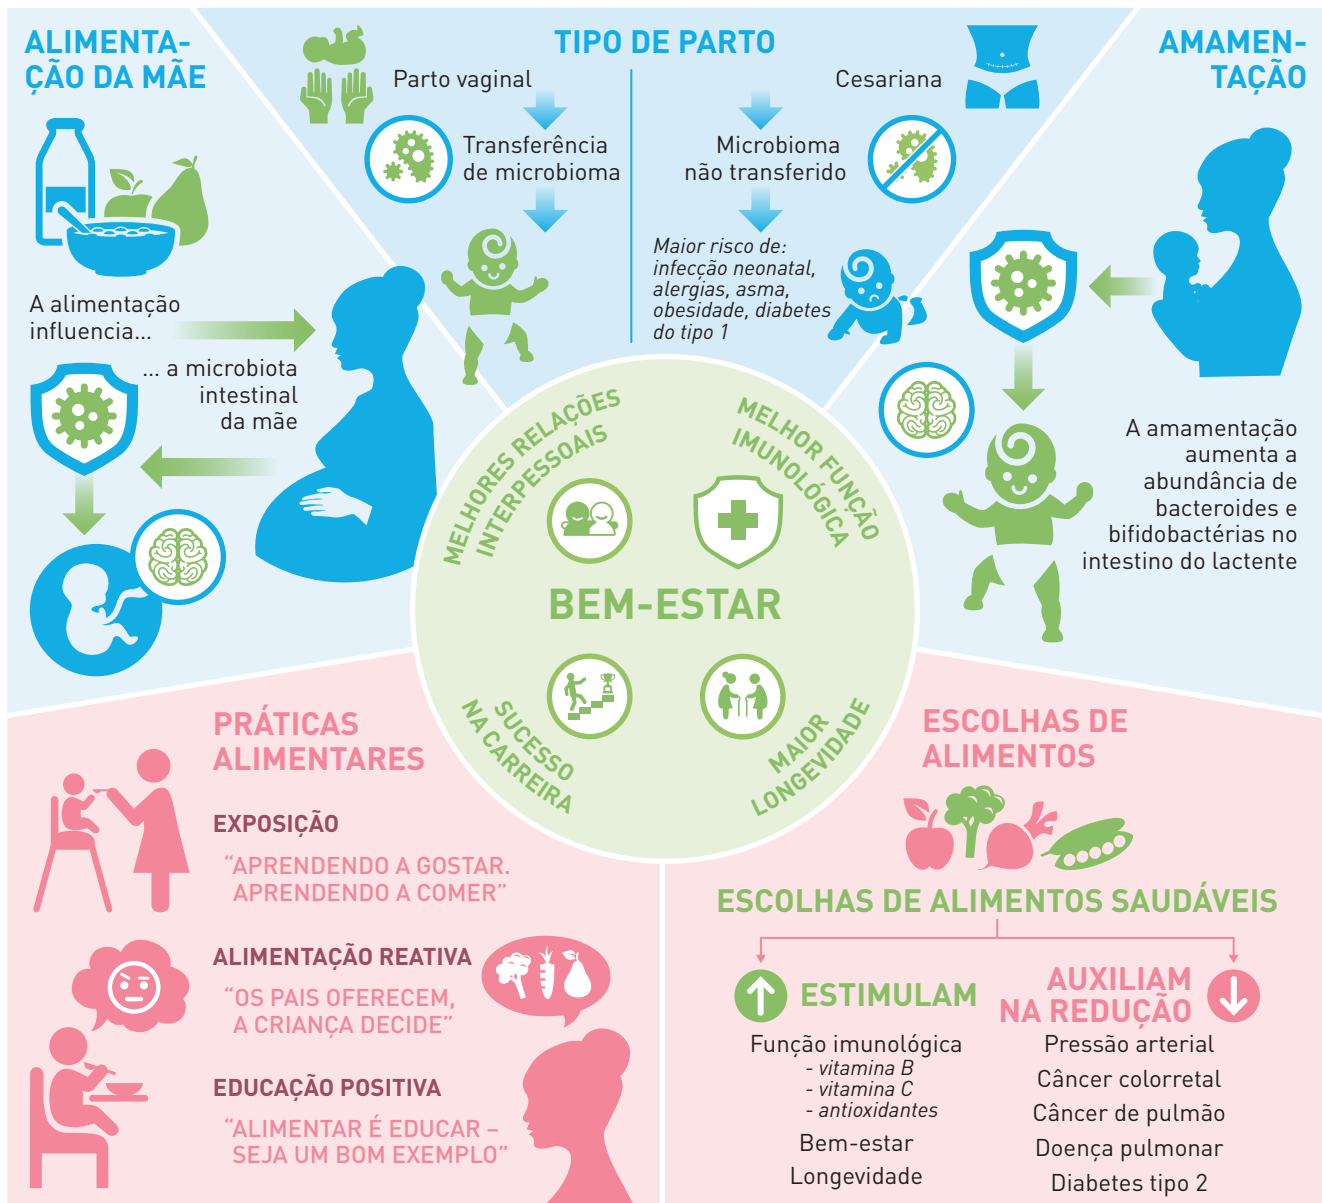

## FATORES QUE PROMOVEM O DESENVOLVIMENTO DE COMPORTAMENTOS SAUDÁVEIS

Fatores maternos, e práticas alimentares saudáveis contribuem para um desenvolvimento físico e cognitivo ideal, contribuindo para o bem-estar da criança.

Promotores de bem-estar nos primeiros anos de vida

Annals of  
**Nutrition & Metabolism**

Annals of Nutrition & Metabolism  
Vol. 74, Suppl. 2, 2019

**NNI** Nestlé  
Nutrition  
Institute

Annales Nestlé  
Vol. 77, No. 1, 2019

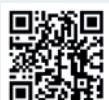

Material destinado exclusivamente ao profissional de saúde.
