# Supplementary material
Source: publisher figshare collection journal article supplement (https://karger.figshare.com/articles/dataset/_/8870056)
Supplement: Supplementary file 7 [file 2]

# Những yếu tố đóng góp đầu đời cho sự khỏe mạnh của trẻ nhỏ

**Chế độ ăn uống đóng vai trò chính trong việc hỗ trợ sự phát triển thể chất và nhận thức khỏe mạnh**

Trục não ruột là trục hai hướng. Việc hiểu sâu hơn về mối quan hệ hai chiều này tạo ra cơ hội để thay đổi trọng tâm chăm sóc sức khỏe từ chẩn đoán và điều trị bệnh sang bồi dưỡng sức khỏe.

## CÁC YẾU TỐ HỖ TRỢ SỰ PHÁT TRIỂN THỂ CHẤT VÀ NHẬN THỨC

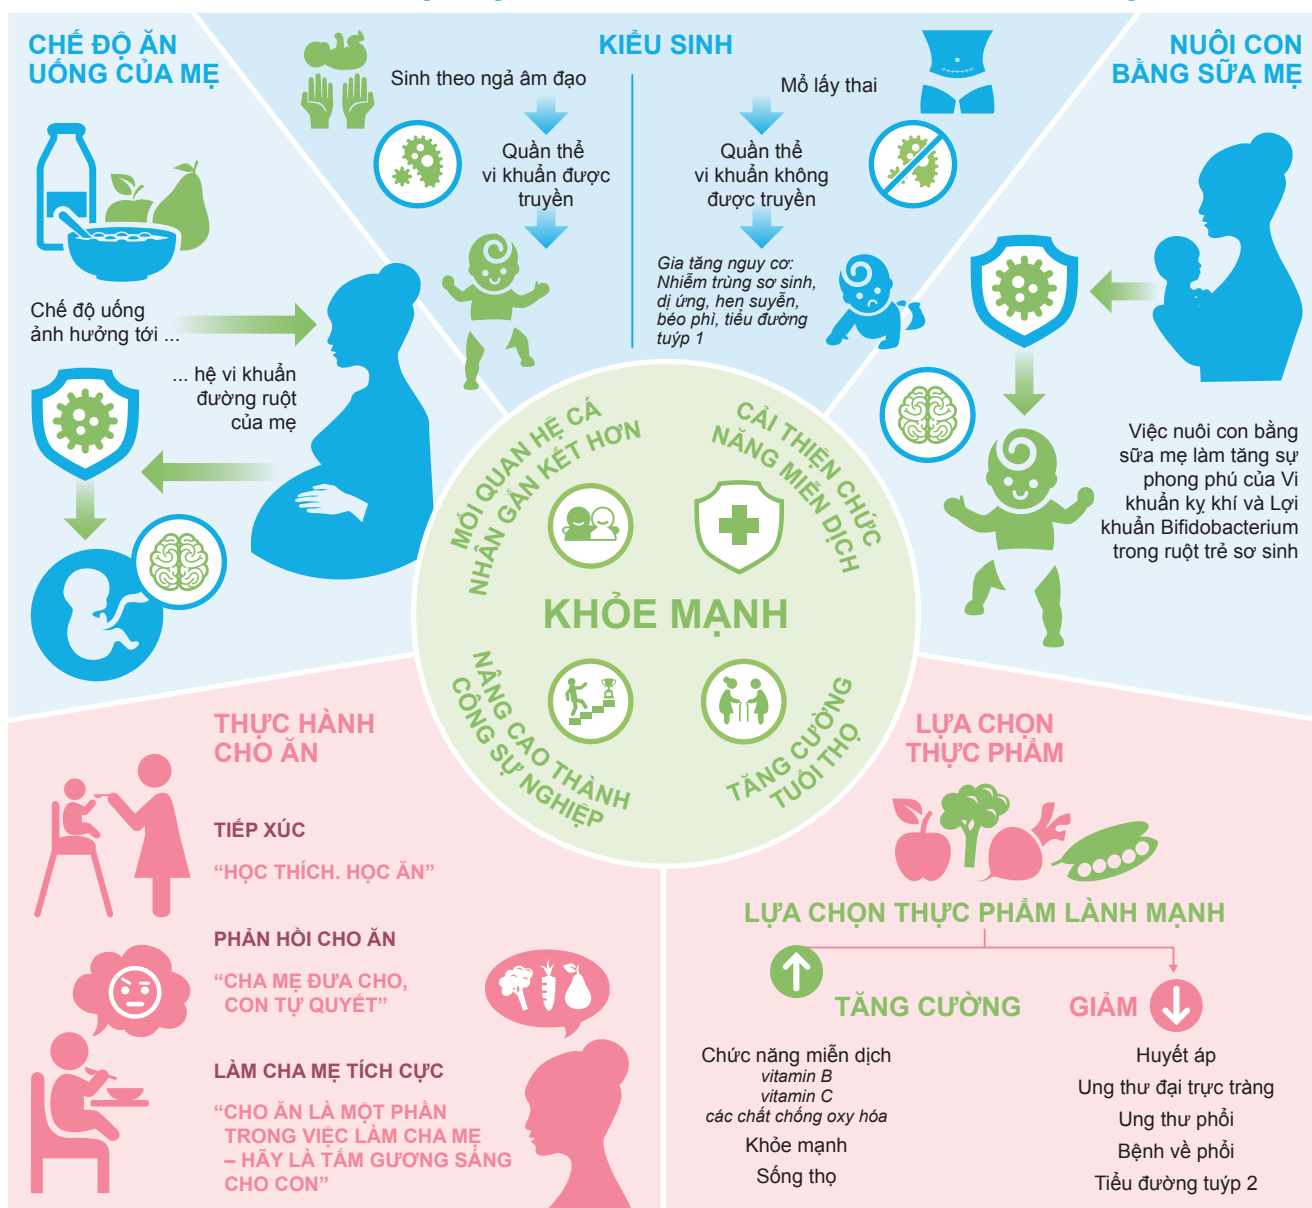

## CÁC YẾU TỐ HỖ TRỢ SỰ PHÁT TRIỂN CỦA HÀNH VI LÀNH MẠNH

Các yếu tố thuộc về mẹ, thực hành cho ăn và lựa chọn thực phẩm lành mạnh góp phần phát triển thể chất và nhận thức tối ưu cũng như hỗ trợ sự khỏe mạnh của trẻ nhỏ.

Những yếu tố đóng góp đầu đời cho sự khỏe mạnh của trẻ nhỏ

Annals of  
**Nutrition & Metabolism**

Annals of Nutrition & Metabolism  
Vol. 74, Suppl. 2, 2019

**NNI** Nestlé  
Nutrition  
Institute

Annales Nestlé  
Vol. 77, No. 1, 2019

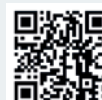

Chỉ dành cho Chuyên gia chăm sóc sức khỏe
