# Supplementary material
Source: publisher figshare collection journal article supplement (https://karger.figshare.com/articles/dataset/_/8870056)
Supplement: Supplementary file 8 [file 2]

# 生命早期影响儿童健康的因素

饮食在保持儿童身体健康和促进认知发育方面发挥着重要作用

脑-肠轴是双向的。深入理解这种双向关系有助于将医疗保健的重点从疾病诊断和治疗转变为提升健康水平。

## 促进身体健康和认知发育的因素

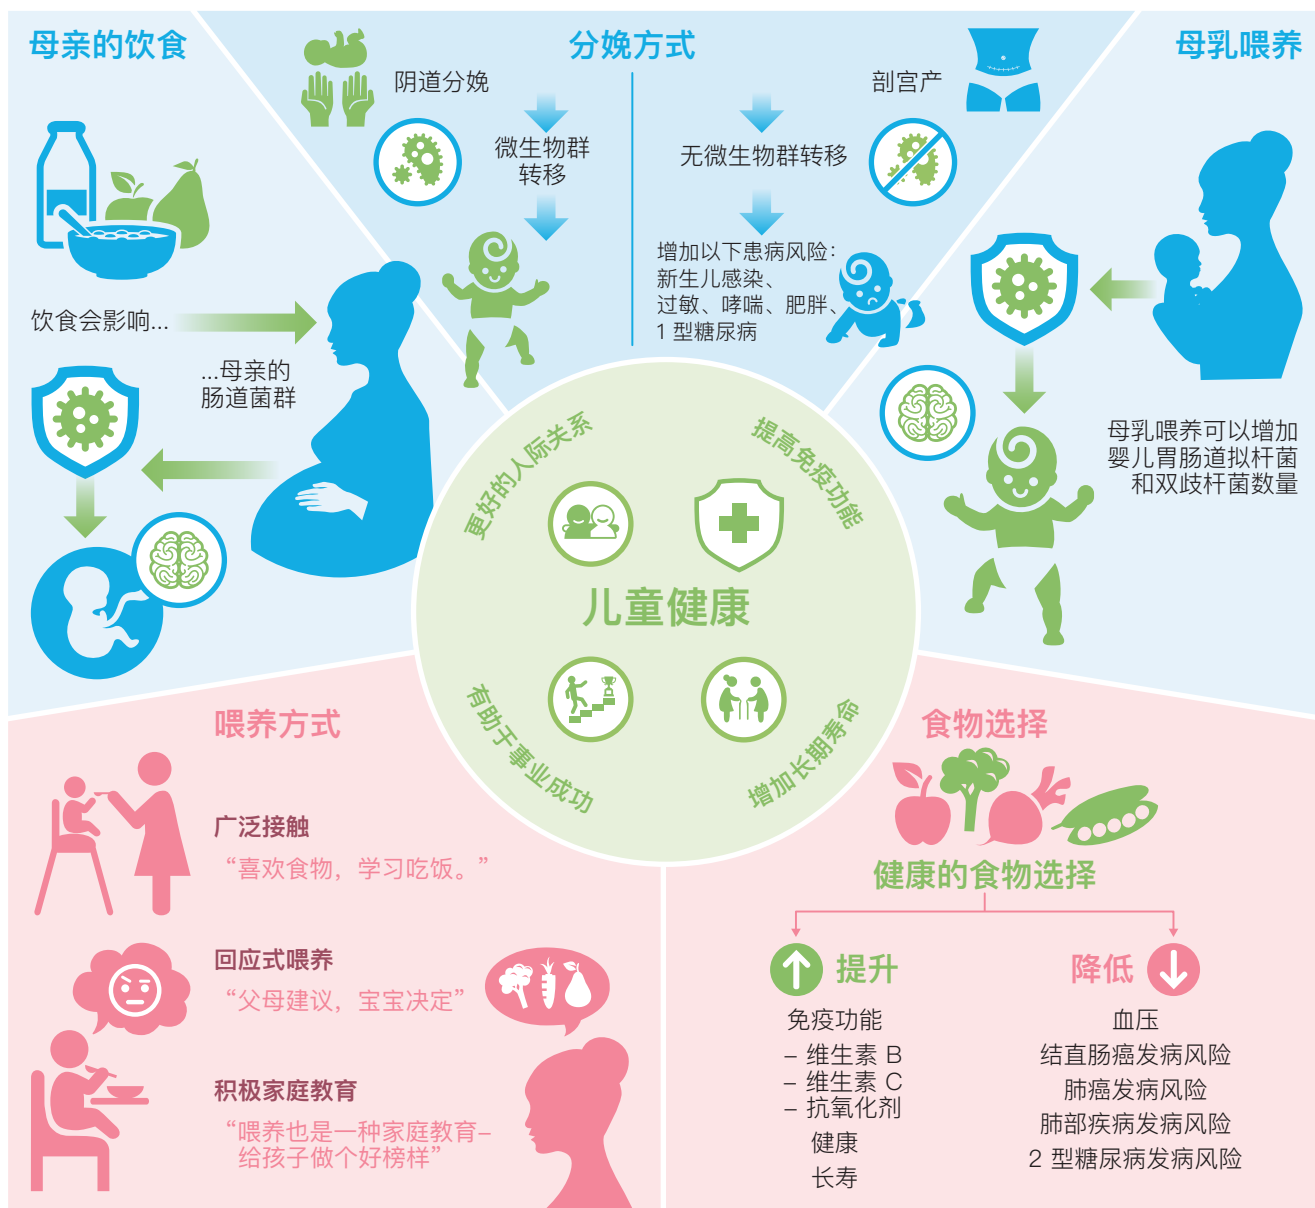

## 促进健康行为发育的因素

科学的孕产期管理、合适的喂养方式和健康的食物选择有助于儿童最佳的身体和认知发展, 并且能支持儿童健康成长

生命早期影响儿童健康的因素

Annals of  
**Nutrition &  
Metabolism**

Annals of Nutrition & Metabolism  
Vol. 74, Suppl. 2, 2019

**NNI** Nestlé  
Nutrition  
Institute

Annales Nestlé  
Vol. 77, No. 1, 2019

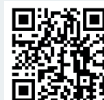

仅供医疗保健专业人士使用
