# Supplementary material
Source: publisher figshare collection journal article supplement (https://karger.figshare.com/articles/dataset/_/8870056)
Supplement: Supplementary file 9 [file 2]

# Factores que contribuyen al bienestar infantil en los primeros años de vida

La alimentación desempeña un papel fundamental para el adecuado desarrollo físico y cognitivo

El eje cerebro-intestino es bidireccional. Comprender mejor la relación entre ambos ofrece oportunidades para cambiar el enfoque de la atención sanitaria mejorando el diagnóstico y el tratamiento de enfermedades y fomentando el bienestar integral.

## FACTORES QUE FAVORECEN EL DESARROLLO FÍSICO Y COGNITIVO

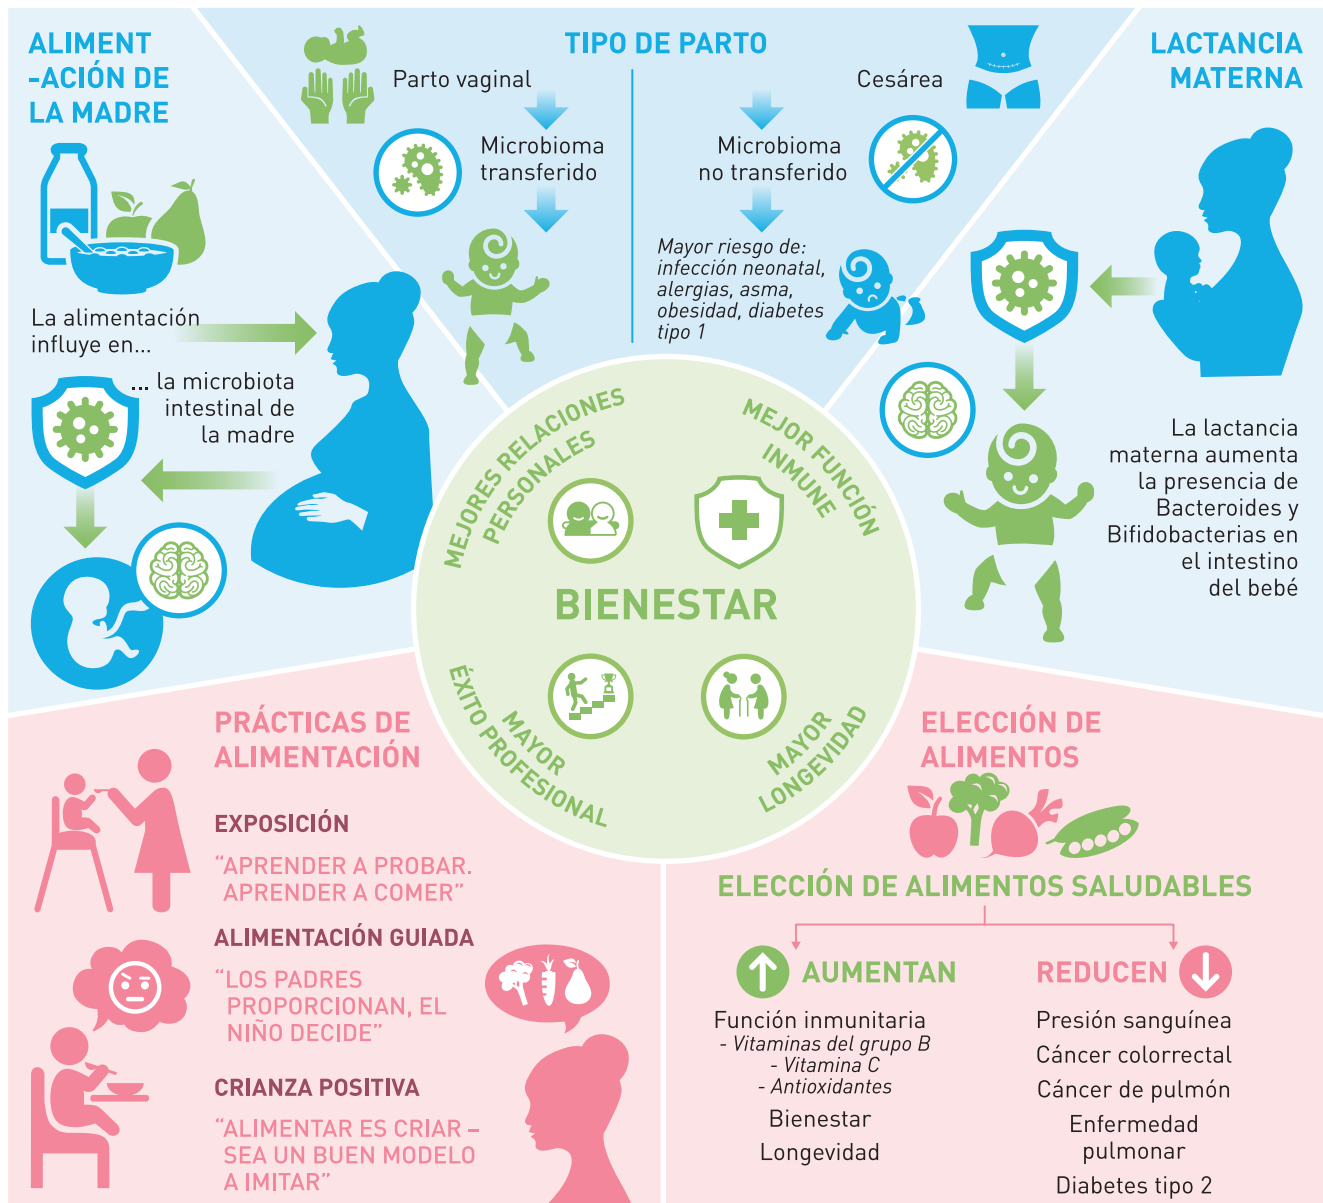

## FACTORES QUE FAVORECEN EL DESARROLLO DE HÁBITOS SALUDABLES

Los factores maternos, las prácticas de alimentación y la elección de alimentos saludables contribuyen a un desarrollo físico y cognitivo óptimo y favorecen el bienestar infantil.

Factores que contribuyen al bienestar infantil en los primeros años de vida

Annals of  
**Nutrition & Metabolism**

Annals of Nutrition & Metabolism  
Vol. 74, Suppl. 2, 2019

**NNI** Nestlé  
Nutrition  
Institute

Annales Nestlé  
Vol. 77, No. 1, 2019

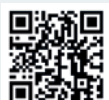

Solo para profesionales de la salud
