# Supplementary material
Source: publisher figshare collection journal article supplement (https://karger.figshare.com/articles/dataset/_/8870056)
Supplement: Supplementary file 10 [file 2]

# Faktory, které mají v útlém věku vliv na zdraví dítěte

Výživa hraje klíčovou roli při podpoře zdravého fyzického i kognitivního rozvoje

Osa střevo – mozek funguje obousměrně. Hlubší pochopení tohoto dvoustranného vztahu vytváří příležitosti pro změnu zacílení zdravotní péče od diagnostiky a léčby onemocnění k podpoře zdraví.

## FAKTORY PODPORUJÍCÍ FYZICKÝ A KOGNITIVNÍ ROZVOJ

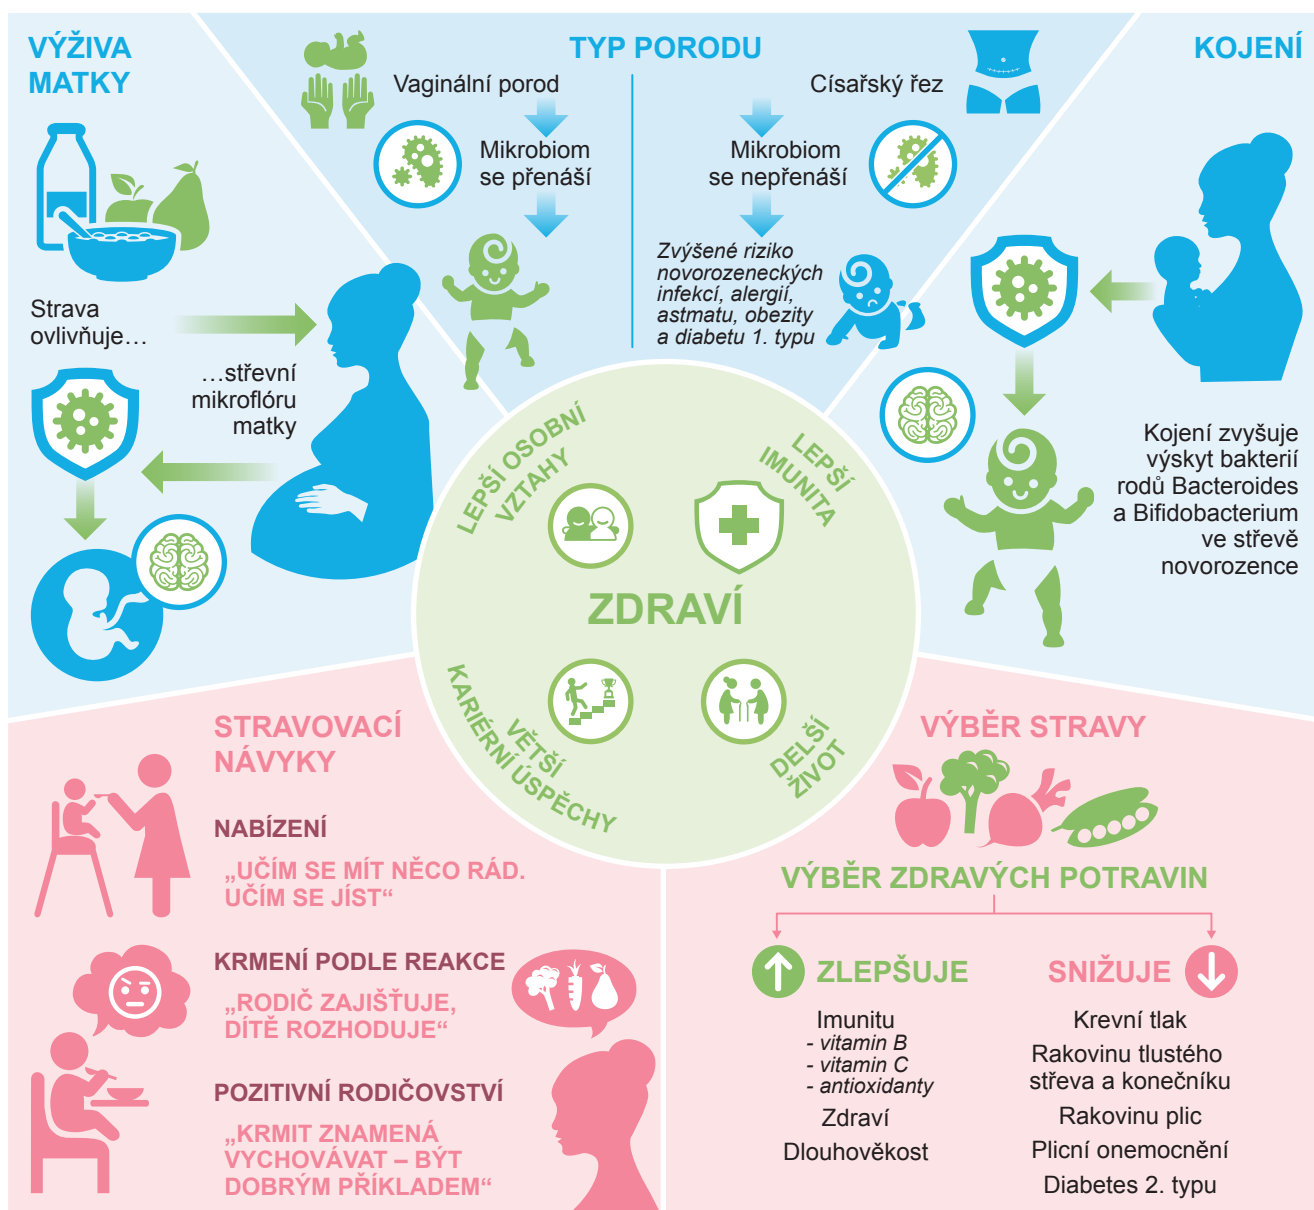

## FAKTORY PODPORUJÍCÍ ROZVOJ ZDRAVÝCH NÁVYKŮ

Mateřství, způsob výživy a výběr zdravých potravin přispívají k optimálnímu fyzickému i kognitivnímu rozvoji a podporují celkové zdraví dítěte.

Faktory, které mají v útlém věku vliv na zdraví dítěte

Annals of  
**Nutrition & Metabolism**

Annals of Nutrition & Metabolism  
Vol. 74, Suppl. 2, 2019

**NNI** Nestlé  
Nutrition  
Institute

Annales Nestlé  
Vol. 77, No. 1, 2019

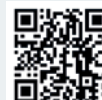

Pouze pro pracovníky ve zdravotnictví
